# Supplementary material for: Lightweight Design Solutions in the Automotive Field: Environmental Modelling Based on Fuel Reduction Value Applied to Diesel Turbocharged Vehicles
Source: Preprints.org preprint supplement (doi:10.20944/preprints201611.0059.v1), 2016-11-10
Supplement: Supplementary file 1 [file supplementary]

# Lightweight design solutions in the automotive field: environmental modelling based on Fuel Reduction Value applied to diesel turbocharged vehicles

Dr. Massimo Delogu

Department of Industrial Engineering, University of Florence, 50139 Florence Italy. Tel: (+39) 055 275 8733

Dr. Francesco Del Pero

Department of Industrial Engineering, University of Florence, 50139 Florence Italy. Tel: (+39) 055 275 8769

Prof. Marco Pierini

Department of Industrial Engineering, University of Florence, 50139 Florence Italy. Tel: (+39) 055 275 8748

## Abstract

A tailored model for the assessment of environmental benefits achievable by ~~light-weighting design solutions~~ in the automotive field is presented. The model is based on the Fuel Reduction Value (FRV) coefficient which expresses the Fuel Consumption (FC) saving involved by a 100 kg ~~vehicle~~ mass reduction. The work is composed by two main sections: simulation and environmental modelling. Simulation modelling performs an in-depth calculation of weight-induced FC whose outcome is the FRV evaluated for a wide range of Diesel Turbocharged (DT) vehicle case studies. Environmental ~~modelling~~ converts fuel saving to impact reduction basing on the FRVs obtained by simulations. [Results show that for the considered case studies FRV is within the range 0.115-0.143 and 0.142-0.388 l/100km\\*100kg respectively for mass reduction only and powertrain adaptations \(secondary effects\).](#) The implementation of FRVs within the environmental modelling represents the added value of the research and makes the model a ~~valuable and tailorable~~ tool for application to ~~real automotive DT~~ case studies [of automotive lightweight LCAs](#).

## Keywords

Automotive, Fuel consumption, Fuel Reduction Value (FRV), Life Cycle Assessment (LCA), Light-weighting, Vehicle system dynamics.

## 1. Introduction

Global society strongly depends on transportation and the development trends forecast a substantial growth in this sector over the coming decades [1]. Considering the European Union, transportation industry represents the second largest contributor to anthropogenic ~~gGreenh~~House ~~g~~Gas (GHG) emissions and around 20% of these emissions are ~~caused~~ generated by road transports [2]. In this context light-duty vehicles account for approximately 10% of total energy use and GHG emissions [3], [4]. Considering that the number of cars is expected to increase from roughly 700 million to 2 billion over the period 2000-2050 [5], a dramatic increase in gasoline and diesel demand with implications on energy security, climate change and urban air quality appears to be very likely ([6], [7], [8], [9], [11], [10], [81], [912], [103], [114], [115], [116], [117], [118]). ~~It is known that~~ for an Internal Combustion Engine (ICE) car ~~the~~ use stage is responsible ~~for~~ a relevant quota of total Life Cycle (LC) impact (e.g. 85% in terms of Global Warming Potential, (GWP)); ~~the latter and it~~ is mainly due to Fuel Consumption (FC) which ~~in turn~~ ~~strongly~~ depends on vehicle mass ([129], [1320], [1424], [1522], [1623], [1724], [1825], [1926]).

Light-weighting ~~through the adoption of novel materials and innovative technologies~~ is unanimously recognized as one of the key measures in order to lower ~~the car~~ use stage FC and environmental ~~burden~~ pressure ([207], [218], [229], [2330], [2431]); ~~although~~, on the other hand, ~~the adoption of novel materials and innovative technologies often~~ the risk ~~to~~ shifts the impacts to other LC stages (e.g. production and End-of-Life, (EoL) [2532], [2633], [34], [35], [36]) ~~could be very high~~ ([37], [38], [39], [40], [41], [19], [42]). [In this regard plastics, composites, aluminum, high-strength steel and magnesium and sandwich materials and sandwich are key materials are expected to play a leading increasingly important role in the future. Aluminum, high-strength steel and composites can be used both in structural \(i.e. frame or seat structure\) and functional \(i.e. steering, transmission\) parts where strength is the key requirement; on the other hand for interior parts plastic will remain the predominant element and it will become also more important in the next future, due to its favorable cost-weight ratio. On the other hand, despite light-weighting allows lowering use stage impact by reduction of use stage FC, it usually involves negative effects on production and End-of-Life \(EoL\) stages \[2734\], \[2835\], \[2936\], \[307\], \[318\]. Indeed lightweight materials are usually more energy-intensive and involve higher CO<sub>2</sub> emissions prior to operation use stage if compared with conventional steel. At the same time, recycling of composites is still not a well-established practice, contrary to what happens for metals \[329\], \[3340\], \[3441\], \[129\], \[3542\]. Therefore, a balance of benefits and disadvantages involved by light-weighting during the whole vehicle LC is needed; this allows quantifying the driving distance for which the reduced use stage FC compensates production and EoL emissions thus involving an actual LC benefits.](#)

[In this regard](#) ~~At this purpose,~~ the Life Cycle Assessment (LCA) methodology ~~results~~ the most indicated approach ~~for~~ to performing the environmental assessment ~~and balance the eco-profile~~ of lightweight solutions ~~during their whole LC~~. Many LCA studies ~~already~~ exist in the transportation sector ([3643], [3744], [3845], [46], [47], [48], [349], [450];

[51]) and the interest is continuously growing, particularly in the automotive field ([3744], [129], [4152], [4253], [4354], [4455], [4556], [57], [58], [59], [4660]).

Considering ~~use stage within~~ the automotive lightweight LCA context, literature provides several examples of comparative studies based on Fuel Reduction Value (FRV) coefficient ([2], [3845], [4761], [4862], [4963]). The FRV adopted by current LCAs is comprised ~~within the range between~~ 0.02 ~~and~~ 1.00 [l/100km\*100kg]; ~~this estimation such a range~~ derives from other works ([1421], [5064], [65], [66], [67], [5168], [5269], [5370], [5471], [72], [5573], [5674], [5775]) that ~~treat with analytical modelling of~~ mass-induced FC ~~by investigating into account~~ the theoretical background and underlying physical correlations. From the review of this typology of studies, some considerations emerge. The researches are based on simulation modelling of a very restricted number of ~~specific~~ car models; therefore ~~the resulting values of FRVs obtained~~ FRVs are influenced by ~~depend on~~ technical features of ~~the considered~~ case studies without being really representative of ~~the entire entire vehicle classes~~ or engine technologies ~~they belong to~~. Furthermore the existing works determine the FRV basing on ~~standardized a reference~~ driving cycles ([5876], [5977], [6078]) ~~that usually is the standardized cycle effective in the geographic area where the research is conducted~~ (the American researches generally refer to the Federal Test Procedure driving cycles [6179] while the European ones to the NEDC [6280]). Consequently the ~~adopted reference cycles~~ changes passing from one study to ~~another~~, thus involving a relevant limitation in terms of comparability ~~for the of~~ FRV ~~value~~. Additionally ~~to this~~, the adoption of a single cycle as basis for calculation ~~strongly limits the involves a relevant limitation in terms of~~ reliability of results as no further driving ~~style pattern~~ is ~~taken into account~~ evaluated.

The proposed work is an extension of [5064] and it refines an environmental model able to treat with ~~the use stage~~ within the automotive lightweight LCA context in applications ~~ss~~ to Diesel Turbocharged (DT) vehicles; ~~t- he aim is supporting LCA practitioners to evaluate the environmental benefits achievable by light-weighting in real case studies. The aim of the model is supporting LCA practitioners to estimate the environmental benefits achievable by light-weighting in application to real case studies~~ aimed estimating the potentiality of light-weighting to lower the environmental impact since the early design phase and it is proposed as tool for LCA practitioners in application to real case studies. Starting from the amount of mass reduction, the model estimates the avoided impacts through the Fuel Reduction Value (FRV) coefficient which is determined by a simplified calculation procedure based on vehicle technical features. Such a procedure derives from an in-depth simulation modelling of car weight-induced FC which tries to fill the gaps of existing literature: ▲

- FRV is estimated for a large number of vehicle case studies belonging to A/B, C and D classes; within each class ~~a wide range of car technical features is taken into account;~~
- vehicle case studies are representative of 2015 European car market;
- FRV is evaluated basing on the most globally widespread driving cycles;
- ~~the analysis is extended to both Primary Mass Reduction only (PMR) and Secondary Effects (SE); in case of SE~~ a valid criterion for their application is refined.

~~The benefits advantage obtained through achieved by mass reduction is are quantified in terms of avoided impacts by through an environmental modelling based on the FRV coefficient; this latter is determined through an in depth calculation of weight induced FC which struggles to overcome the points of criticism that which affect current LCA practices.~~

## 2. Materials and method

The construction of the model ~~consists articulated into of~~ three main stages. ~~In t~~The first stage ~~envisages the calculation of~~ FC ~~is calculated~~ for various mass-configurations of a certain number of vehicle case studies; ~~c- The calculation is performed through a car system dynamics simulation modelling of car dynamics. The output of the stage is constituted exclusively by vehicle FC.~~ The second stage evaluates the mass-induced FC starting from the output of the first one; basing on values of FC ~~obtained for of~~ the different mass-configurations, mass-induced FC is determined through the relation between consumption and mass. The third stage consists in the conception of a tailored LCA model which implements mass-induced FC calculated in stage 2 and provides as ~~an output the~~ LCIA impacts. Following paragraphs ~~describe illustrate~~ in detail the three stages.

### 2.1. Calculation of use stage FC

The calculation of use stage FC is performed through an AMESim simulation model. Below the modelling is described in terms of ~~model~~ composition, driving cycles and ~~range of vehicle case studies extension of the analysis~~. The model estimates torque at wheels needed in order to follow the speed profile of ~~the considered~~ driving cycle by simulating all ~~vehiele drivetrain~~ components ~~of vehicle drivetrain~~. The automotive network is subdivided into two sections: drive train

Formattato: SpazioDopo: 12 pt

Formattato: Tipo di carattere:  
(Predefinito) +Corpo (Calibri), Inglese  
(Regno Unito)

Formattato: Paragrafo elenco,  
Rientro: Sinistro: 0,5 cm, Sporgente  
0,5 cm, SpazioPrima: 0 pt, Dopo: 12  
pt, Aggiungi spazio tra paragrafi dello  
stesso stile, Puntato + Livello:1 +  
Allinea a: 0,63 cm + Imposta un rientro  
di: 1,27 cm, Sillabare, Regola lo spazio  
tra testo asiatico e in alfabeto latino,  
Regola lo spazio tra caratteri asiatici e  
numeri

Formattato: Tipo di carattere: 10 pt

(sub-models: engine, clutch, gearbox and vehicle dynamics) and control logic (sub-models: mission profile and ambient data, driver and control unit). The complete model is shown in Figure 1.

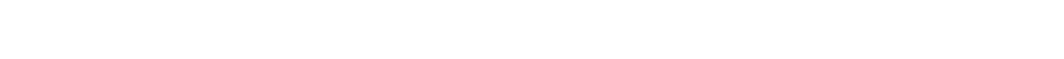

Codice campo modificato

Formattato: Allineato a sinistra,  
SpazioDopo: 0 pt, Interlinea singola  
Tabella formattata

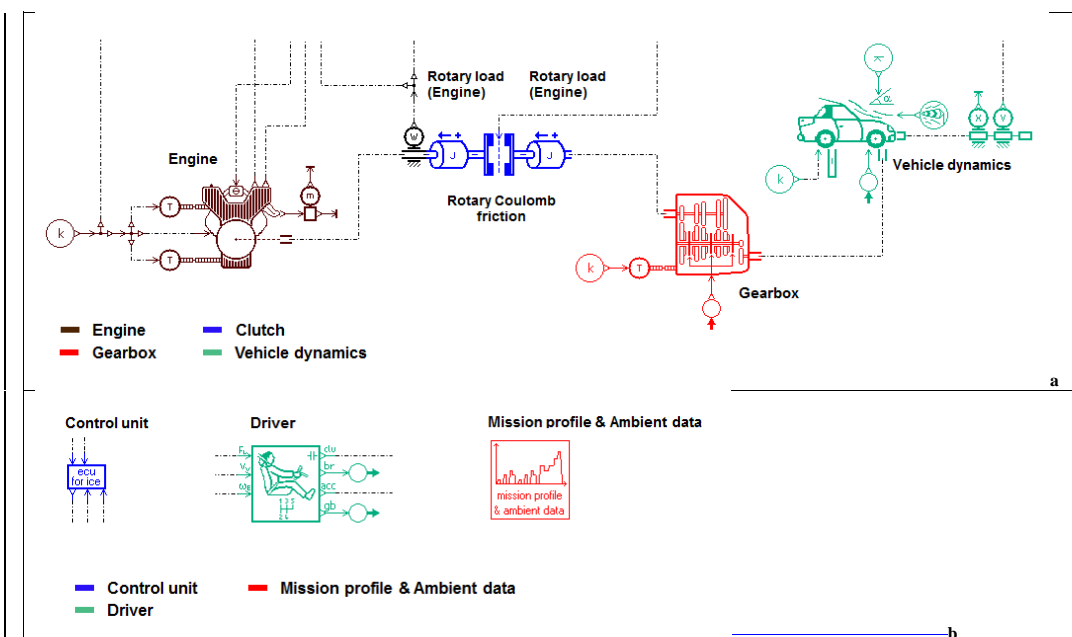

Figure 1. Use stage simulation model: drive train section (a) and control logic section (b)

The driving cycles assumed as reference for simulation ~~modelling~~ are the following: Federal Test Procedure 72 (FTP72) [6384], Japan 08 (JC08) [6482], New European Driving Cycle (NEDC) [6384] and World Light Test Cycle (WLTC) [5876]. The ~~first three cycles~~ are the ~~reference for~~ current type ~~approval test approval~~ respectively ~~in of the~~ U.S., Japan and Europe while WLTC will substitute the NEDC in the coming years. ~~In order to determine results really representative of the considered classes, the modelling is applied to a large certain number of DT vehicle case studies belonging to A/B, C and D classes representative offrom different classes within the 2015 European car market, thus allowing this allows estimating the FRV by a range, thus to considering a certain variability of vehicle technical features within each class. The number of case studies (see Table 1) within per vehicleeach class depends exclusively on the availability in literature of data needed for the setting of simulation model.~~

Codice campo modificato

Table 1. Reference mass-configuration – Variable model parameters: car models chosen as reference

| Reference mass-configuration - Variable model parameters - Reference car models |                               |            |                                |            |                            |
|---------------------------------------------------------------------------------|-------------------------------|------------|--------------------------------|------------|----------------------------|
| A/B-class                                                                       |                               | C-class    |                                | D-class    |                            |
| Case study                                                                      | Vehicle model                 | Case study | Vehicle model                  | Case study | Vehicle model              |
| 1                                                                               | A. R. MiTo 1.6 JTDm 120cv     | 11         | A. R. Giulietta 1.6 JTDm 105cv | 23         | BMW 318d 2.0 150cv         |
| 2                                                                               | CITROEN C3 1.4 HDi 70cv       | 12         | A. R. Giulietta 2.0 JTDm 150cv | 24         | BMW 320d 2.0 163cv         |
| 3                                                                               | CITROEN C3 1.6 HDi 115cv      | 13         | A. R. Giulietta 2.0 JTDm 175cv | 25         | BMW 320d 2.0 190cv         |
| 4                                                                               | FIAT Cinquecento 1.3 MJT 95cv | 14         | CITROEN C4 1.6 HDi 90cv        | 26         | BMW 325d 2.0 218cv         |
| 5                                                                               | FIAT Panda 1.3 MJT 75cv       | 15         | CITROEN C4 1.6 HDi 115cv       | 27         | CITROEN C5 1.6 HDi 115cv   |
| 6                                                                               | FIAT Punto 1.3 MJT 75cv       | 16         | CITROEN C4 2.0 HDi 150cv       | 28         | CITROEN C5 2.0 HDi 140cv   |
| 7                                                                               | FIAT Punto 1.3 MJT 85cv       | 17         | FIAT Bravo 1.6 MJT 90cv        | 29         | CITROEN C5 2.0 HDi 165cv   |
| 8                                                                               | FIAT Punto 1.3 MJT 95cv       | 18         | FIAT Bravo 1.6 MJT 120cv       | 30         | FORD Mondeo 1.6 TDCi 115cv |

|    |                           |    |                           |    |                            |
|----|---------------------------|----|---------------------------|----|----------------------------|
| 9  | FORD Fiesta 1.5 TDCi 75cv | 19 | FIAT Bravo 1.6 MJT 165cv  | 31 | FORD Mondeo 2.0 TDCi 150cv |
| 10 | FORD Fiesta 1.6 TDCi 95cv | 20 | FORD Focus 1.5 TDCi 95 cv | 32 | FORD Mondeo 2.0 TDCi 180cv |
|    |                           | 21 | FORD Focus 1.5 TDCi 120cv |    |                            |
|    |                           | 22 | FORD Focus 2.0 TDCi 150cv |    |                            |

## 2.2. Evaluation of mass-induced FC reduction

The evaluation of mass-induced FC is performed through the FRV coefficient. The procedure for calculating the FRV is described below separately between the cases of [Primary Mass Reduction \(PMR\)](#) and [Secondary Effects \(SE\)](#).

[Primary Mass Reduction \(PMR\)](#). ~~M~~The mass-induced FC is determined as the consumption saving achievable through car mass reduction only and it is calculated ~~by~~through the following relation:

$$FC_{use\_sav\_PMR} = FRV_{PMR} * mass_{sav} \quad Eq. 1$$

Where  $FRV_{PMR}$  = Fuel Reduction Value in case of Primary Mass Reduction [l/100km\*100kg];  $FC_{use\_sav\_PMR}$  = amount of Fuel Consumption saved during operation thanks to lightweighting in case of Primary Mass Reduction [l/100km];  $mass_{sav}$  = saved mass thanks to lightweighting [kg].

The FRV coefficient is estimated basing on values of FC obtained in stage 1. For each one of ~~the considered~~ vehicle case studies, consumption is calculated for the following five mass-configurations: reference ~~mass~~ and ~~lightweighting~~ of 5%, 10%, 15% ~~and~~ 20% ~~lightweight~~respectively. Starting from values of FC, the FRV is determined as the slope of regression line of consumption in function of mass. As ~~in case of PMR~~ the target is evaluating the effect of ~~mass~~mass only, FC of lightweight configurations is estimated through the same simulation model ~~in which~~where the only ~~parameter that~~ changes is vehicle weight, all the others remaining unaltered.

[Secondary Effects \(SE\)](#). ~~M~~The mass-induced FC is determined as the consumption saving achievable through car mass reduction with ~~implementation of~~ further interventions ~~at the vehicle to the vehicle~~. It is calculated through the following relation:

$$FC_{use\_sav\_SE} = FRV_{SE} * mass_{sav} \quad Eq. 2$$

Where  $FRV_{SE}$  = Fuel Reduction Value in case of Secondary Effects [l/100km\*100kg];  $FC_{use\_sav\_SE}$  = amount of Fuel Consumption saved during operation thanks to lightweighting in case of Secondary Effects [l/100km];  $mass_{sav}$  = saved mass thanks to lightweighting [kg].

~~SE~~secondary Effects are applied to lightweight configurations only and they consist in resizing vehicle powertrain in order that mass reduction is exclusively used for lowering FC while performance and technological levels remain unaltered. For performance level the chosen criterion is the “80-120 km/h elasticity in the upper gear ratio”. On the other hand technological level is represented by parameters Maximum Brake Mean Effective Pressure ( $BMEP_{max}$ ), Stroke-to-Bore ratio (SBR) and Mean Piston Speed (MPS), whose analytical expression is reported below:

$$BMEP_{max} = \frac{T_{max} * 4\pi}{V} \quad Eq. 3$$

$$SBR = \frac{stroke}{bore} \quad Eq. 4$$

$$MPS = \frac{stroke * rpm}{30} \quad Eq. 5$$

Where  $BMEP_{max}$  = maximum Brake Mean Effective Pressure [bar];  $T_{max}$  = maximum engine torque [Nm];  $V$  = engine displacement [l];  $SBR$  = Stroke-to-Bore ratio [null];  $stroke$  = engine stroke [m];  $bore$  = engine bore [m];  $MPS$  = Mean Piston Speed [m/s];  $rpm$  = engine speed [rpm].

## 2.3. Environmental modelling

The third stage consists in the conception of a tailored LCA model able to convert mass reduction to avoided use stage environmental impacts. The model takes into account both ~~the~~ sub-stages that compose ~~the~~ use ~~stage~~: Well-To-Tank -

Formattato: SpazioDopo: 10 pt

WTT (fuel transformation processes upstream to fuel consumption) and Tank-To-Wheel - TTW (FC for car driving). In order to include both quota, a GaBi6 plan composed by ~~the~~ WTT and TTW processes is conceived. In the construction of the plan ~~the~~ TTW process ~~is has been~~ completely modelled by an analytical parameterization of inputs/output flows while ~~the~~ WTT process ~~is has been~~ taken from the GaBi6 process database (section “Energy conversion-Fuel production-Refinery products”) without any modification. For this reason ~~hereinafter in the following~~ the only TTW process is described in detail in terms of input/output flows and equations that model input ~~and~~ output flows. Table 2 shows TTW ~~The inputs/and output flows of TTW process are reported in Table 2 and: for each flow~~ a qualitative description ~~and the reference from GaBi6 database of them~~ are reported.

**Table 2.** Environmental model: inputs/outputs and related GaBi6 flows of TTW process

| TTW process |                                                                                                                       |                                                                 |
|-------------|-----------------------------------------------------------------------------------------------------------------------|-----------------------------------------------------------------|
|             | Parameters                                                                                                            | GaBi6 flows                                                     |
| INPUT       | Amount of Fuel Consumption saved during operation thanks to lightweighting ( $FC_{use\_sav}$ )                        | <i>Diesel - Refinery products [kg]</i>                          |
|             | Amount of biogenic CO <sub>2</sub> emission saved during operation thanks to lightweighting ( $CO_{2BIO\_use\_sav}$ ) | <i>Carbon dioxide (biotic) – Inorganic emissions to air [g]</i> |
| OUTPUT      | Amount of fossil CO <sub>2</sub> emission saved during operation thanks to lightweighting ( $CO_{2FOS\_use\_sav}$ )   | <i>Carbon dioxide (fossil) – Inorganic emissions to air [g]</i> |
|             | Amount of SO <sub>2</sub> emission saved during operation thanks to lightweighting ( $SO_{2\_use\_sav}$ )             | <i>Sulphur dioxide – Inorganic emissions to air [kg]</i>        |

The equations that model input/output flows of TTW process are reported in Table 3.

**Table 3.** Environmental model: basic equations of TTW process

|        |                       | TTW equations                                                                                                                                                                                                                                                                                                                                                                          |       |
|--------|-----------------------|----------------------------------------------------------------------------------------------------------------------------------------------------------------------------------------------------------------------------------------------------------------------------------------------------------------------------------------------------------------------------------------|-------|
| INPUT  | $FC_{use\_sav}$       | $FC_{use\_sav} = \frac{FRV * mass_{sav} * mileage_{use}}{10000} * \rho_{fuel}$                                                                                                                                                                                                                                                                                                         | Eq. 6 |
|        | $CO_{2BIO\_use\_sav}$ | $CO_{2BIO\_use\_sav} = CO_{2BIO\_veh\_km} * mileage_{use} * \frac{FC_{use\_sav}}{FC_{use\_veh}}$ <p>Where:</p> $CO_{2BIO\_veh\_km} = CO_{2\_veh\_km} * share_{CO_{2BIO}}$ $CO_{2\_veh\_km} = share_{mw} * CO_{2\_veh\_km\_mw} + share_{ru} * CO_{2\_veh\_km\_ru} + share_{ur} * CO_{2\_veh\_km\_ur}$ $FC_{use\_veh} = \frac{FC_{veh\_100km}}{100} * mileage_{use} * \rho_{fuel}$       | Eq. 7 |
|        | $CO_{2FOS\_use\_sav}$ | $CO_{2FOS\_use\_sav} = CO_{2FOS\_veh\_km} * mileage_{use} * \frac{FC_{use\_sav}}{FC_{use\_veh}}$ <p>Where:</p> $CO_{2FOS\_veh\_km} = CO_{2\_veh\_km} * (1 - share_{CO_{2BIO}})$ $CO_{2\_veh\_km} = share_{mw} * CO_{2\_veh\_km\_mw} + share_{ru} * CO_{2\_veh\_km\_ru} + share_{ur} * CO_{2\_veh\_km\_ur}$ $FC_{use\_veh} = \frac{FC_{veh\_100km}}{100} * mileage_{use} * \rho_{fuel}$ | Eq. 8 |
| OUTPUT | $SO_{2\_use\_sav}$    | $SO_{2\_use\_sav} = SO_{2\_veh\_km} * mileage_{use} * \frac{FC_{use\_sav}}{FC_{use\_veh}}$ <p>Where:</p> $SO_{2\_veh\_km} = \frac{ppm_{sulphur}}{1000000} * 2 * \frac{FC_{veh\_100km}}{100} * \rho_{fuel}$ $FC_{use\_veh} = \frac{FC_{veh\_100km}}{100} * mileage_{use} * \rho_{fuel}$                                                                                                 | Eq. 9 |

**Legenda:**

$FRV$  = Fuel Reduction Value [l/100km\*100kg];  
 $mass_{sav}$  = saved mass thanks to lightweighting [kg];  
 $mileage_{use}$  = total mileage during operation [km];  
 $\rho_{fuel}$  = fuel density [kg/l];  
 $CO_{2BIO\_veh\_km}$  = per-kilometre biogenic CO<sub>2</sub> emission of reference vehicle [g/km];  
 $FC_{use\_veh}$  = amount of Fuel Consumption during operation of reference vehicle [g/km];  
 $CO_{2\_veh\_km}$  = per-kilometre CO<sub>2</sub> emission of reference vehicle [g/km];  
 $share_{CO_{2BIO}}$  = share of biogenic C in fuel;  
 $share_{mw}$   $share_{ru}$   $share_{ur}$  = share of total mileage respectively for motorway, rural and urban route;  
 $CO_{2\_veh\_km\_mw}$   $CO_{2\_veh\_km\_ru}$   $CO_{2\_veh\_km\_ur}$  = per-kilometre CO<sub>2</sub> emission of reference vehicle respectively for motorway, rural and urban route [g/km];  
 $FC_{veh\_100km}$  = per-100kilometre Fuel Consumption of reference vehicle [l/100km];  
 $CO_{2FOS\_veh\_km}$  = per-kilometre fossil CO<sub>2</sub> emission of reference vehicle [g/km];  
 $SO_{2\_veh\_km}$  = per-kilometre SO<sub>2</sub> emission of reference vehicle [kg/km];  
 $ppm_{sulphur}$  = sulphur content in fuel [ppm];

The environmental model is customizable for the specific case study through the setting of the following parameters:

- $CO_{2\_veh\_km}$  and  $SO_{2\_veh\_km}$  are taken from the GaBi6 process database (section “Transport-Road-Passenger car”) depending on emission standard, engine size and technology of the ~~specific considered case study~~ vehicle;
- $FRV$  is an output of stage 2 “Evaluation of mass-induced FC reduction” and it is chosen depending on the specific case study through the criteria identified in paragraph 3.24.1.;
- $\rho_{fuel}$ ,  $mileage_{use}$ ,  $ppm_{sulphur}$ ,  $share_{CO_{2BIO}}$  are taken from the GaBi6 process database depending on fuel type of the ~~specific case study~~ considered vehicle;
- $FC_{veh\ 100km}$ ,  $mass_{saved}$ ,  $mileage_{use}$ ,  $share_{mw}$ ,  $share_{ru}$ ,  $share_{ur}$  depend on the specific case study application.

### 3. Results, interpretation and discussion

Results, interpretation and discussion are presented subdivided into two main sections: simulation and environmental modelling.

#### 3.1. Simulation modelling

**Fuel Reduction Value: analysis of results.** Table 4 reports the  $FRV$ s for all ~~the considered~~ case studies. Data are presented for both PMR ( $FRV_{PMR}$ ) and SE ( $FRV_{SE}$ ). ~~W and w~~ within each one of them five values are reported:

Codice campo modificato

- four values calculated with respect to driving cycles assumed as reference for the study ( $FRV_{FTP72}$ ,  $FRV_{JC08}$ ,  $FRV_{NEDC}$ ,  $FRV_{WLTC}$ )
- one value calculated as the arithmetic mean of  $FRV_{FTP72}$ ,  $FRV_{JC08}$ ,  $FRV_{NEDC}$ ,  $FRV_{WLTC}$  ( $FRV_{MeanCycles}$ ).

In summary, for each case study the complete set of results is composed by 10 values for the  $FRV$ :

- PMR:  $FRV_{FTP72\_PMR}$ ,  $FRV_{JC08\_PMR}$ ,  $FRV_{NEDC\_PMR}$ ,  $FRV_{WLTC\_PMR}$ ,  $FRV_{MeanCycles\_PMR}$ ;
- SE:  $FRV_{FTP72\_SE}$ ,  $FRV_{JC08\_SE}$ ,  $FRV_{NEDC\_SE}$ ,  $FRV_{WLTC\_SE}$ ,  $FRV_{MeanCycles\_SE}$ .



**Table 4.** Fuel Reduction Value for the considered case studies [l/100km\*100kg]

| Vehicle Class | Case study | FRV [l/100km*100kg]                  |                                    |                                    |                                    |                                                |                                     |                                   |                                   |                                   |                                               |
|---------------|------------|--------------------------------------|------------------------------------|------------------------------------|------------------------------------|------------------------------------------------|-------------------------------------|-----------------------------------|-----------------------------------|-----------------------------------|-----------------------------------------------|
|               |            | PMR                                  |                                    |                                    |                                    |                                                | SE                                  |                                   |                                   |                                   |                                               |
|               |            | FTP72<br>(FRV <sub>FTP72_PMR</sub> ) | IC08<br>(FRV <sub>IC08_PMR</sub> ) | NEDC<br>(FRV <sub>NEDC_PMR</sub> ) | WLTC<br>(FRV <sub>WLTC_PMR</sub> ) | Mean cycles<br>(FRV <sub>MeanCycle_PMR</sub> ) | FTP72<br>(FRV <sub>FTP72_SE</sub> ) | IC08<br>(FRV <sub>IC08_SE</sub> ) | NEDC<br>(FRV <sub>NEDC_SE</sub> ) | WLTC<br>(FRV <sub>WLTC_SE</sub> ) | Mean cycles<br>(FRV <sub>MeanCycle_SE</sub> ) |
| A/B           | 1          | 0.173                                | 0.165                              | 0.148                              | 0.146                              | 0.158                                          | 0.295                               | 0.284                             | 0.270                             | 0.253                             | 0.276                                         |
|               | 2          | 0.153                                | 0.140                              | 0.143                              | 0.115                              | 0.138                                          | 0.217                               | 0.212                             | 0.194                             | 0.142                             | 0.191                                         |
|               | 3          | 0.174                                | 0.157                              | 0.145                              | 0.148                              | 0.156                                          | 0.281                               | 0.275                             | 0.259                             | 0.220                             | 0.259                                         |
|               | 4          | 0.149                                | 0.150                              | 0.137                              | 0.117                              | 0.138                                          | 0.253                               | 0.245                             | 0.224                             | 0.214                             | 0.234                                         |
|               | 5          | 0.145                                | 0.151                              | 0.146                              | 0.122                              | 0.141                                          | 0.239                               | 0.237                             | 0.218                             | 0.173                             | 0.217                                         |
|               | 6          | 0.147                                | 0.149                              | 0.136                              | 0.116                              | 0.137                                          | 0.235                               | 0.235                             | 0.215                             | 0.202                             | 0.222                                         |
|               | 7          | 0.150                                | 0.153                              | 0.130                              | 0.120                              | 0.138                                          | 0.246                               | 0.240                             | 0.213                             | 0.225                             | 0.231                                         |
|               | 8          | 0.150                                | 0.148                              | 0.129                              | 0.117                              | 0.136                                          | 0.250                               | 0.241                             | 0.221                             | 0.223                             | 0.234                                         |
|               | 9          | 0.149                                | 0.143                              | 0.137                              | 0.129                              | 0.140                                          | 0.227                               | 0.226                             | 0.207                             | 0.166                             | 0.207                                         |
|               | 10         | 0.149                                | 0.150                              | 0.137                              | 0.117                              | 0.138                                          | 0.253                               | 0.245                             | 0.224                             | 0.214                             | 0.234                                         |
|               | 11         | 0.168                                | 0.159                              | 0.148                              | 0.141                              | 0.154                                          | 0.262                               | 0.253                             | 0.235                             | 0.214                             | 0.241                                         |
|               | 12         | 0.180                                | 0.167                              | 0.154                              | 0.152                              | 0.163                                          | 0.294                               | 0.282                             | 0.266                             | 0.240                             | 0.271                                         |
| C             | 13         | 0.171                                | 0.161                              | 0.149                              | 0.143                              | 0.156                                          | 0.291                               | 0.280                             | 0.270                             | 0.243                             | 0.271                                         |
|               | 14         | 0.154                                | 0.146                              | 0.142                              | 0.137                              | 0.145                                          | 0.245                               | 0.247                             | 0.233                             | 0.206                             | 0.233                                         |
|               | 15         | 0.166                                | 0.157                              | 0.149                              | 0.138                              | 0.153                                          | 0.261                               | 0.252                             | 0.231                             | 0.206                             | 0.238                                         |
|               | 16         | 0.174                                | 0.160                              | 0.156                              | 0.144                              | 0.159                                          | 0.281                               | 0.266                             | 0.252                             | 0.214                             | 0.253                                         |
|               | 17         | 0.165                                | 0.153                              | 0.140                              | 0.138                              | 0.149                                          | 0.289                               | 0.269                             | 0.246                             | 0.233                             | 0.259                                         |
|               | 18         | 0.167                                | 0.159                              | 0.149                              | 0.136                              | 0.153                                          | 0.273                               | 0.259                             | 0.245                             | 0.220                             | 0.249                                         |
|               | 19         | 0.179                                | 0.170                              | 0.154                              | 0.150                              | 0.163                                          | 0.294                               | 0.283                             | 0.269                             | 0.239                             | 0.271                                         |
|               | 20         | 0.160                                | 0.154                              | 0.141                              | 0.133                              | 0.147                                          | 0.273                               | 0.258                             | 0.240                             | 0.216                             | 0.247                                         |
|               | 21         | 0.166                                | 0.157                              | 0.153                              | 0.137                              | 0.153                                          | 0.259                               | 0.246                             | 0.234                             | 0.196                             | 0.234                                         |
|               | 22         | 0.179                                | 0.162                              | 0.163                              | 0.147                              | 0.163                                          | 0.286                               | 0.268                             | 0.249                             | 0.216                             | 0.255                                         |
|               | 23         | 0.187                                | 0.168                              | 0.158                              | 0.150                              | 0.166                                          | 0.297                               | 0.273                             | 0.259                             | 0.224                             | 0.263                                         |
|               | 24         | 0.220                                | 0.189                              | 0.170                              | 0.175                              | 0.189                                          | 0.340                               | 0.298                             | 0.278                             | 0.253                             | 0.292                                         |
| D             | 25         | 0.226                                | 0.188                              | 0.172                              | 0.168                              | 0.189                                          | 0.346                               | 0.305                             | 0.287                             | 0.249                             | 0.297                                         |
|               | 26         | 0.243                                | 0.182                              | 0.168                              | 0.173                              | 0.192                                          | 0.388                               | 0.320                             | 0.300                             | 0.292                             | 0.325                                         |
|               | 27         | 0.156                                | 0.149                              | 0.143                              | 0.131                              | 0.145                                          | 0.243                               | 0.246                             | 0.232                             | 0.197                             | 0.230                                         |
|               | 28         | 0.169                                | 0.161                              | 0.153                              | 0.149                              | 0.158                                          | 0.257                               | 0.259                             | 0.244                             | 0.212                             | 0.243                                         |
|               | 29         | 0.184                                | 0.170                              | 0.158                              | 0.156                              | 0.167                                          | 0.294                               | 0.277                             | 0.261                             | 0.232                             | 0.266                                         |
|               | 30         | 0.166                                | 0.159                              | 0.151                              | 0.141                              | 0.154                                          | 0.266                               | 0.260                             | 0.244                             | 0.207                             | 0.244                                         |
|               | 31         | 0.197                                | 0.170                              | 0.160                              | 0.148                              | 0.169                                          | 0.291                               | 0.264                             | 0.243                             | 0.208                             | 0.252                                         |
|               | 32         | 0.212                                | 0.184                              | 0.171                              | 0.169                              | 0.184                                          | 0.323                               | 0.294                             | 0.271                             | 0.237                             | 0.281                                         |

Figure 2 reports the arithmetic mean of FRV within the class per driving cycle: the black bars identify the maximum range of variation around the mean.

Formattato: Tipo di carattere: 10 pt

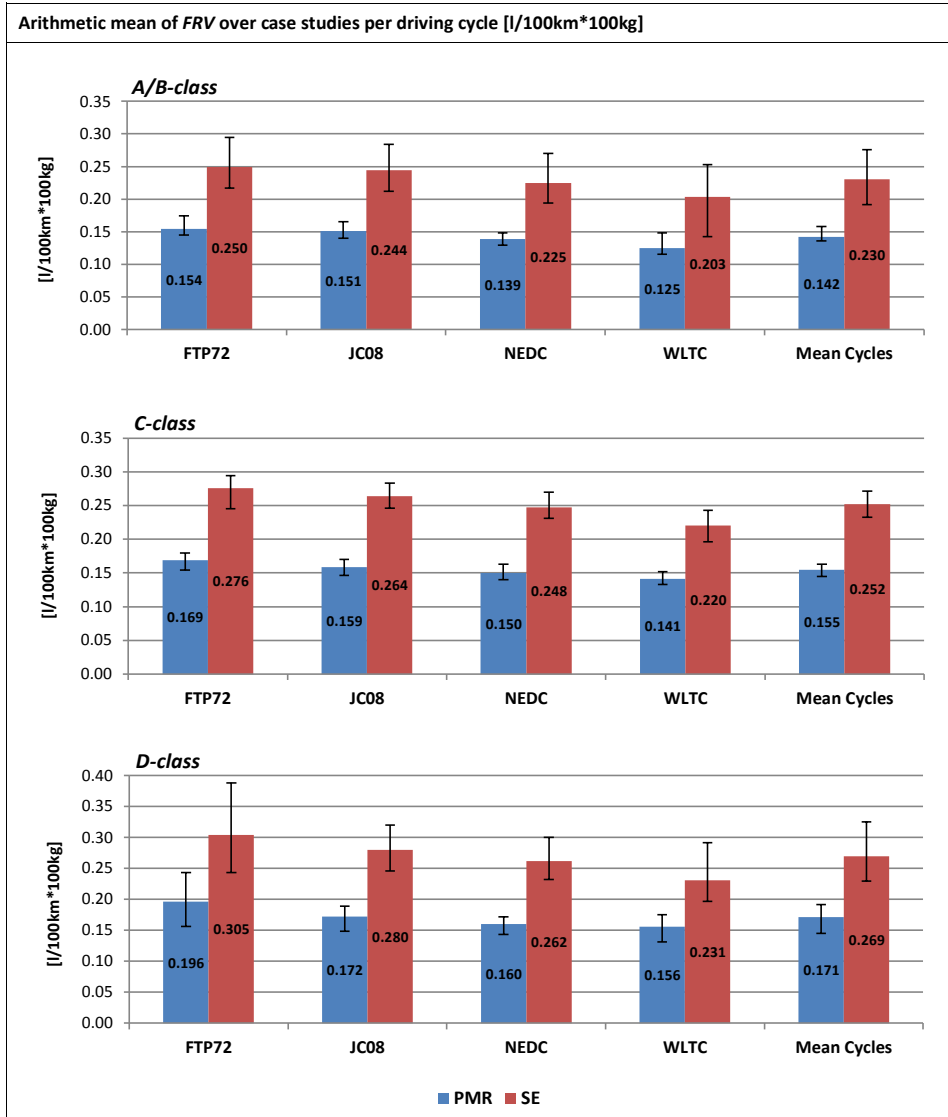

Figure 2. Arithmetic mean of FRV over case studies per driving cycle [l/100km\*100kg]

**Dependence of FRV on vehicle technical features.** This sub-paragraph is aimed to establish if any correlation between the values of FRV and the main vehicle technical features exists. The investigated parameters taken into account are maximum Brake Mean Effective Pressure ( $BMEP_{max}$ ), vehicle mass ( $m_{veh}$ ), maximum Power ( $P_{max}$ ) and Power-to-Mass Ratio ( $P/M$ ). The existence of any correlation is investigated through the analysis of regression lines of  $FRV_{MeanCycles\_PMR}$  and  $FRV_{MeanCycles\_SE}$  respectively in function of  $BMEP_{max}$ ,  $m_{veh}$ ,  $P_{max}$  and  $P/M$ —w; Figure 3 reports the regression lines and corresponding coefficient of determination  $R^2$  (Figure 3) for  $FRV_{MeanCycles}$ .

**FRV<sub>MeanCycles</sub> in function of main vehicle technical features: regression lines**

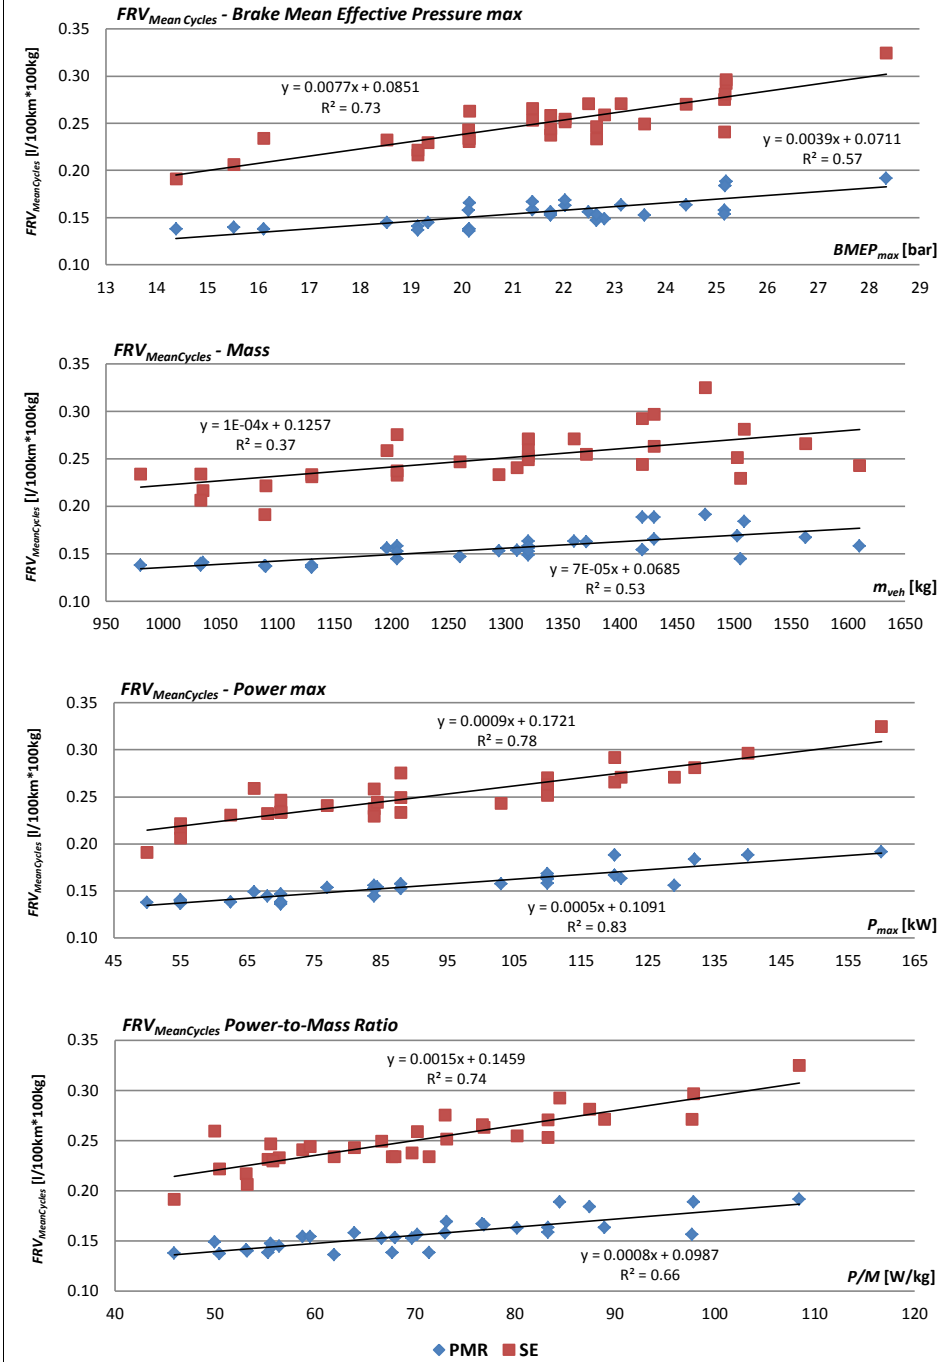

**Figure 3.** FRV<sub>MeanCycles</sub> of all case studies in function of maximum Brake Mean Effective Pressure (BMEP<sub>max</sub>), vehicle mass (m<sub>veh</sub>), maximum Power (P<sub>max</sub>) and Power-to-Mass Ratio (P/M) with regression lines and corresponding coefficient of determination R<sup>2</sup>.

Table 5 quantifies the effectiveness of the correlation between FRV and vehicle parameters by reporting  $R^2$  of regression lines for  $FRV_{FTP72}$ ,  $FRV_{JC08}$ ,  $FRV_{NEDC}$ ,  $FRV_{WLTC}$  and  $FRV_{MeanCycles}$ .

**Table 5.** Coefficient of determination  $R^2$  of regression lines of FRV in function of vehicle technical features

|                                                        | Coefficient of determination $R^2$ |      |              |      |              |      |              |      |                    |      |
|--------------------------------------------------------|------------------------------------|------|--------------|------|--------------|------|--------------|------|--------------------|------|
|                                                        | $FRV_{FTP72}$                      |      | $FRV_{JC08}$ |      | $FRV_{NEDC}$ |      | $FRV_{WLTC}$ |      | $FRV_{MeanCycles}$ |      |
|                                                        | PMR                                | SE   | PMR          | SE   | PMR          | SE   | PMR          | SE   | PMR                | SE   |
| Maximum Brake Mean Effective Pressure ( $BMEP_{max}$ ) | 0.55                               | 0.68 | 0.61         | 0.71 | 0.40         | 0.69 | 0.57         | 0.67 | 0.57               | 0.73 |
| Vehicle mass ( $m_{veh}$ )                             | 0.45                               | 0.36 | 0.46         | 0.41 | 0.53         | 0.43 | 0.59         | 0.21 | 0.53               | 0.37 |
| Maximum Power ( $P_{max}$ )                            | 0.79                               | 0.78 | 0.78         | 0.80 | 0.74         | 0.82 | 0.78         | 0.55 | 0.83               | 0.78 |
| Power-to-Mass Ratio (PMR)                              | 0.65                               | 0.72 | 0.66         | 0.73 | 0.56         | 0.75 | 0.58         | 0.57 | 0.66               | 0.74 |

The values of  $R^2$  in Table 5 show evidence that for both PMR and SE a significant correlation between FRV and vehicle technical features exists. The values of  $R^2$  vary depending on driving cycle:

- the highest correlation is for  $P_{max}$ .  $R^2$  is about 0.8 for all cycles (except  $FRV_{WLTC\_SE}$  for which it is 0.55) with a value of 0.83 and 0.78 respectively for  $FRV_{MeanCycles\_PMR}$  and  $FRV_{MeanCycles\_SE}$ ;
- the lowest correlation is for  $m_{veh}$  ( $R^2$  ranges between a minimum of 0.21 for  $FRV_{WLTC\_SE}$  and a maximum of 0.59 for  $FRV_{WLTC\_PMR}$ );
- intermediate values of  $R^2$  refer to PMR and BMEP.

### 3.2. Environmental modelling

The environmental modelling converts mass saving to impact reduction through the implementation of the FRV coefficient within the basic equations of TTW process; the added value is represented by the fact that parameters which characterize TTW process (see paragraph 2.3.) are customizable for the specific application. In particular, the possibility to set the FRV allows performing the quantification of impact reduction taking into account as much as possible technical features of the specific case study; therefore, so that impacts saving achievable through lightweighting is determined more accurately with respect to comparative studies that assume as reference a value for the FRV fixed a priori. In order to customize the environmental model described in paragraph 2.3, in such a way it represents a valid reference for LCA practitioners in application to real case studies, based on the entirety of FRVs obtained for the various case studies, a criterion able to deduce a value of FRV customized for any generic application starting from the entirety of FRVs referring to the various case studies is defined; therefore, by so doing simulation and environmental modelling are merged and the output of the first one represents the input for the second one. The chosen approach struggles to take into account the variability of FRV with respect to the main vehicle technical features. Previous paragraph analyzes the correlation between FRV and maximum Brake Mean Effective Pressure ( $BMEP_{max}$ ), vehicle mass ( $m_{veh}$ ), maximum Power ( $P_{max}$ ) and Power-to-Mass Ratio ( $P/M$ ) by identifying regression lines and corresponding coefficients of determination  $R^2$ . Basing on values of  $R^2$  reported in Table 5, it has been shown that it can be stated that for both PMR and SE the correlation between FRV and the chosen technical features is notable and it is maximum for parameter  $P_{max}$ . In the light of these considerations, the refined approach for quantifying the FRV for any generic application is the same for both PMR and SE:

- PMR: the FRV is obtained from the regression line of  $FRV_{MeanCycles\_PMR}$  in function of  $P_{max}$  through the maximum power of the generic application (see Figure 3).
- SE: the FRV is obtained from the regression line of  $FRV_{MeanCycles\_SE}$  in function of  $P_{max}$  through the maximum power of the generic application (see Figure 3).

Codice campo modificato

Codice campo modificato

Table 6 summarizes the chosen approach in order to quantify the FRV for application to any generic vehicle case study.

Formattato: Interlinea singola

**Table 6.** Input for environmental modelling: criterion for quantifying the FRV of any generic vehicle case study

| FRV [l/100km*100kg]                                                                 |                                                                                   |
|-------------------------------------------------------------------------------------|-----------------------------------------------------------------------------------|
| PMR                                                                                 | SE                                                                                |
| $FRV_{PMR} = 0.0005 * P_{max}$ $+ 0.1091 FRV_{PMR}$ $= 0.0009 * P_{max}$ $+ 0.1721$ | $FRV_{SE} = 0.0009 * P_{max}$ $+ 0.1721 FRV_{SE}$ $= 0.0005 * P_{max}$ $+ 0.1091$ |

Notes:  $P_{max}$  in [kW]

**Formattato:** Colore carattere: Automatico, Inglese (Regno Unito), Crenatura 12 pt

With respect to basic equations of TTW process (see Table 3) the following observations are made:

- the amount of FC saved during operation ( $FC_{use\_sav}$ ) has a leading role in the economy of the overall plan. On one hand  $FC_{use\_sav}$  fixes the amount of fuel whose avoided production is assessed by WTT process; on the basis of such an amount the saving in WTT impact is calculated. On the other hand  $FC_{use\_sav}$  determines the amount of TTW air emissions saved during operation on the basis of which the saving in TTW impact is calculated (see Eq. 7, 8, 9);
- $FC_{use\_sav}$  scales linearly with the saved mass on the basis of the FRV coefficient;
- the amount of air emissions saved during operation ( $CO_{2BIO\_use\_sav}$ ,  $CO_{2FOS\_use\_sav}$ ,  $SO_{2use\_sav}$ ) scales linearly with the amount of FC saved during operation ( $FC_{use\_sav}$ ); as  $FC_{use\_sav}$  scales linearly too with the saved mass, also the saved emissions behaves the same way;
- considering the typology of air emissions, only CO<sub>2</sub> and SO<sub>2</sub> are taken into account. Such a choice appears to be reasonable because FC saving involved by mass reduction influences only CO<sub>2</sub> and SO<sub>2</sub> emissions while it has no effect on the so-called “limited emissions” (i.e. NO<sub>x</sub>, HC, etc). Indeed, CO<sub>2</sub> and SO<sub>2</sub> emissions scale linearly with the amount of FC basing on fuel C and S content while the limited emissions depend exclusively on the number of travelled kilometers as they are treated by exhaust gas treatment system.

**Formattato:** Nessun elenco puntato o numerato

**Formattato:** Tipo di carattere: 11 pt

**Formattato:** SpazioDopo: 10 pt, Interlinea singola

**Formattato:** Interlinea singola

**Formattato:** Tipo di carattere: Times New Roman

**Formattato:** Evidenziato

**Formattato:** Rientro: Sinistro: 1,27 cm, Interlinea singola, Nessun elenco puntato o numerato

**Formattato:** Interlinea singola

**Formattato:** Tipo di carattere: 9 pt

**Formattato:** Tipo di carattere: 11 pt

**Formattato:** SpazioPrima: 12 pt, Interlinea singola

**Formattato:** Tipo di carattere: (Predefinito) Times New Roman, 8 pt

**Formattato:** SpazioDopo: 0 pt, Interlinea singola

**Formattato:** Tipo di carattere: (Predefinito) Times New Roman, 8 pt

**Formattato:** SpazioDopo: 0 pt, Interlinea singola

**Formattato:** Tipo di carattere: (Predefinito) Times New Roman, 8 pt

**Formattato:** SpazioDopo: 0 pt, Interlinea singola

**Formattato:** Tipo di carattere: (Predefinito) Times New Roman, 8 pt

**Formattato:** SpazioDopo: 0 pt, Interlinea singola

**Formattato:** Tipo di carattere: (Predefinito) Times New Roman, 8 pt

**Formattato:** SpazioDopo: 0 pt, Interlinea singola

**Formattato:** SpazioDopo: 0 pt, Interlinea singola

### 3.3. Application to real case study

This section deals with the application of simulation and environmental modelling to a real LCA case study. The chosen application is taken from a comparative lightweight LCA for an automotive component [39] (Delogu et al., 2015). The assessment is aimed to assess two solutions for an Air Intake Manifold (AIM) which differ in construction material:

- Reference solution: polyamide reinforced with 30% of glass fibre, PAGF30 (scenario n°1 in [39] Delogu et al., 2015);
- Lightweight solution: polypropylene composite reinforced with 35% of glass fibre, PPGF35 (scenario n°5 [39] in Delogu et al., 2015).

The functional unit for the study is the distribution of the appropriate air intake flow to the individual cylinders of a 1300cc DT engine in order to ensure the correct combustion process of the fuel. The PAGF30 AIM mass is about 1.9 kg opposite to 1.6 kg of PPGF35 AIM; therefore the lightweight solution allows a 18% mass reduction. For the impact assessment, the following impact categories are adopted: abiotic depletion potential elements (ADPe), abiotic depletion potential fossil (ADPf), acidification potential (AP), eutrophication potential (EP), global warming potential (GWP), ozone layer depletion potential (ODP), photochemical ozone creation potential (POCP). As reference vehicle for the modelling of use stage, a specific compact car is has been selected: Table 7 shows its main technical data.

**Table 7.** Technical data of reference car model for use stage

| FIAT Panda 1.3. MJT (model year 2016) |                     |
|---------------------------------------|---------------------|
| Curb mass [kg]                        | 1045                |
| Propulsion                            | Diesel Turbocharged |
| Engine displacement [cc]              | 1248                |
| Maximum power [kW]                    | 70                  |

|                                  |                                      |
|----------------------------------|--------------------------------------|
| Emission stage                   | EURO 6                               |
| Mixed consumption [l/100km]      | 3.6                                  |
| CO <sub>2</sub> emissions [g/km] | 94                                   |
| SO <sub>2</sub> emissions [g/km] | Vedere da GaBi 6.42*10 <sup>-4</sup> |
| Use stage [km]                   | 150000                               |

Table 7. Technical data of reference car model for use stage

Considering that weight reduction represents a negligible share of total car mass, for the modelling of use stage it is assumed to take into account only the case of PMR; FRV is determined through the criterion defined in paragraph 3.2. (equation for  $FRV_{PMR}$  in Table 6) and it amounts to 0.144 l/100km\*100kg.

Figure 4 reports total LC impact of lightweight solution expressed as percentage of the one of reference solution. Results show that lightweight solution involves a notable reduction of the AIM LC-potential environmental impacts. The highest impact reduction (40%) regards AP, while for ADPe the benefit is negligible (3%); the other categories present reductions that range between 27 and 35%.

Figures 5 and 6 report contribution analysis by LC stage of potential environment impact respectively for polyamide and polypropylene composite AIM. Data show that the change of construction material causes a notable growth of use stage quota for the majority of impact categories (15 – 20%), totally to the detriment of production. This fact can be explainable through the minor energy intensity of polypropylene composite production processes despite the lower mass. EoL quotas present a moderate increase (maximum increase is 6% for EP).

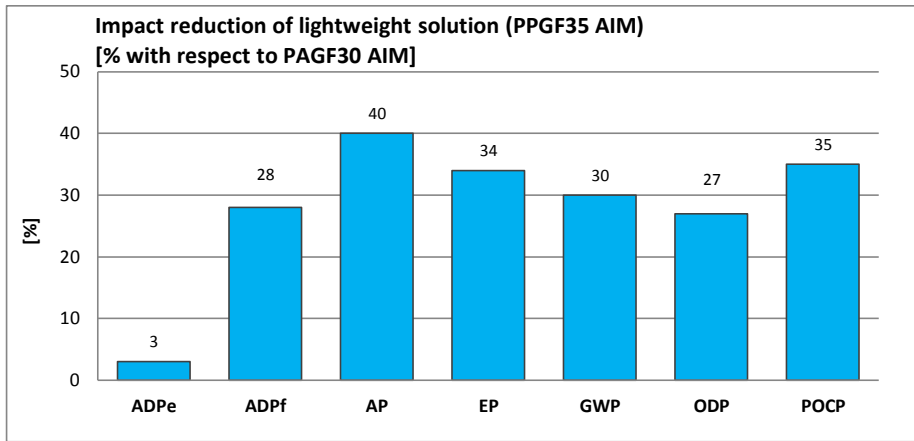

Figure 4. LCA results for polypropylene composite AIM expressed as percentage of polyamide composite AIM

Formattato: Tipo di carattere: (Predefinito) Times New Roman, 8 pt

Formattato: SpazioDopo: 0 pt, Interlinea singola

Formattato: Tipo di carattere: (Predefinito) Times New Roman, 8 pt

Formattato: SpazioDopo: 0 pt, Interlinea singola

Formattato: Tipo di carattere: (Predefinito) Times New Roman, 8 pt

Formattato: SpazioDopo: 0 pt, Interlinea singola

Formattato: Tipo di carattere: (Predefinito) Times New Roman, 8 pt

Formattato: SpazioDopo: 0 pt, Interlinea singola

Formattato: Apice

Formattato: Tipo di carattere: (Predefinito) Times New Roman, 8 pt

Formattato: Tipo di carattere: (Predefinito) Times New Roman, 8 pt

Formattato: SpazioDopo: 0 pt, Interlinea singola

Formattato: Interlinea singola

Formattato: SpazioDopo: 0 pt, Interlinea singola

Formattato: Interlinea singola

Formattato: Tipo di carattere: 8 pt, Grassetto

Formattato: Tipo di carattere: 8 pt

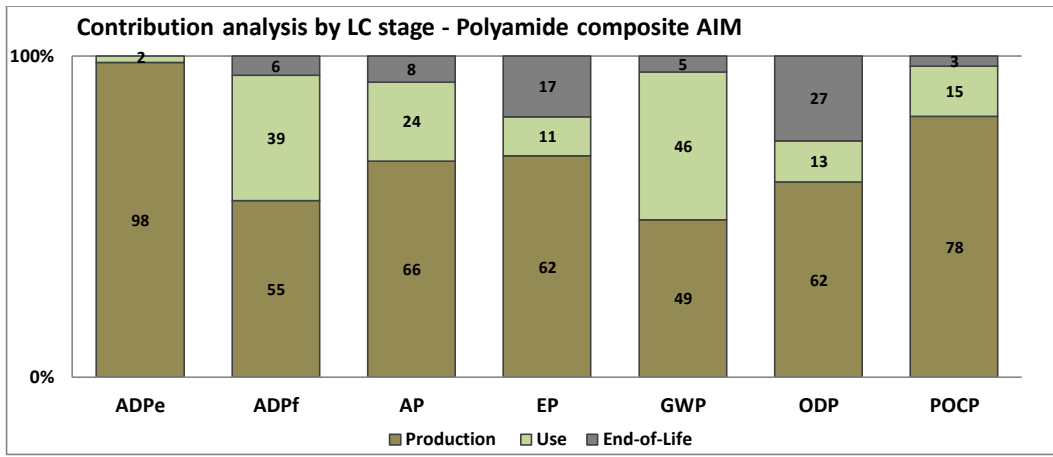

Figure 5. Contribution analysis by LC stage for polyamide composite AIM

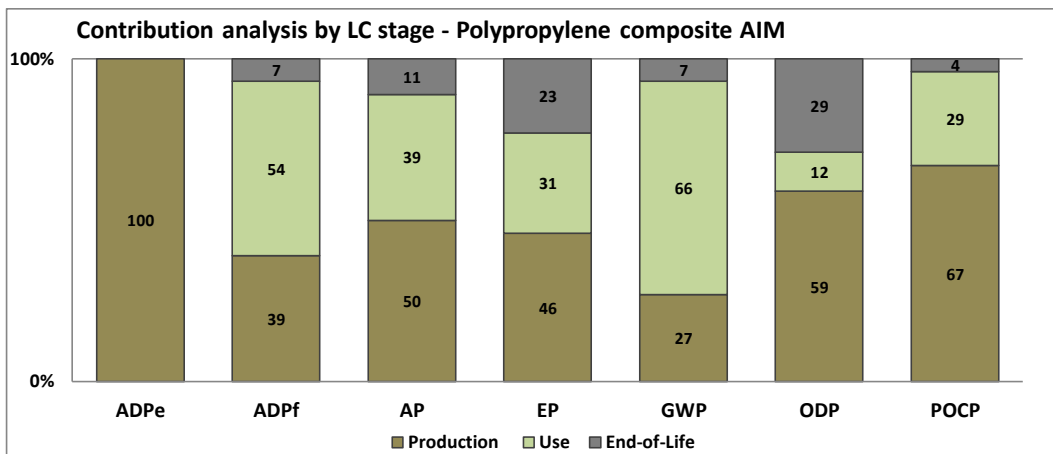

Figure 6. Contribution analysis by LC stage for polypropylene composite AIM

#### 4. Conclusions

The work refines a tool for the assessment of environmental benefits achievable by lightweight design solutions in the automotive field. The tool is obtained through the integration of an use stage a simulation and environmental modelling that implements a FRV-based approach with an environmental modelling in LCA perspective and it is based on t. The estimation of FC reduction achievable by light-weighting by means of is performed basing on the FRV coefficient. The FRV is determined through a simulation modelling of entire vehicle drivetrain; this allows taking into account all car energy expenditures and evaluating the effect that each drivetrain component has on FC and, consequently, on FRV. As input for the modelling, data of 32 DT vehicle case studies vehicle models taken from 2015 European car market archive have been gathered and elaborated; thed. The characterization of FRV for a wide range of vehicle case studies enables examining as much as possible in detail each specific application, thus obtaining more accurate results with respect to current FRV-based approaches existing studies FRV-based approach literature. The calculation is based on performed taking into account not only the NEDC but also other three four standardized driving cycles, allowing both comparison with existing studies and evaluation of use stage basing on various driving styles scenarios of route and driving behavior. For the estimation of environmental impacts reduction achievable by lightweighting, a model based on the FRV and customiztailorable for any generic application is refined; this is done. The potentiality to lower FC through mass reduction is estimated by taking into account the value of FRV (output of simulation modelling) that is closest to the specific application in terms of vehicle class, size and technical features. Theis remarkable modularity of

Formattato: Tipo di carattere: 8 pt, Grassetto

Formattato: Tipo di carattere: 8 pt, Grassetto

Formattato: Tipo di carattere: 8 pt

Formattato: SpazioPrima: 12 pt, Dopo: 10 pt, Aggiungi spazio tra paragrafi dello stesso stile, Interlinea multipla 1,15 ri, Nessun elenco puntato o numerato, Sillabare

Formattato: Tipo di carattere: 8 pt, Grassetto

Formattato: Tipo di carattere: 8 pt

the model allowspermits to obtaine more accurate results with respect to literature. Particularly, in the comparative LCA perspective, a balancing-between the opposite effects that-the adoption-of light-weighting-design-solutions involves on component LC stages (higher energy-intensity/emissions during production and reduced FC during operation)-is possible; in this regard, Furthermore, the possibility to set LC mileage within the environmental modelling allows to determineidentifying the break-even mileage for the effective environmental convenience of innovative-lightweight solutions with respect to-the reference ones. At this regard, the model is able to perform assessments both in case lightweighting does not involve car re-design and in case re-design is applied to the vehicle.



## References

- [1] Hawkins, T.R., Singh, B., Majeau-Bettez, G., Stromman, A.H., 2012. Comparative environmental life cycle assessment of conventional and electric vehicles. *J. Industrial Ecol.* 17 (1), 53e64.
- [2] Witik, R.A., Payet, J., Michaud, V., Ludwig, C., Manson, J.A.E., 2011. Assessing the life cycle costs and environmental performance of lightweight materials in automobile applications. *Composites: Part A* 42, 1694-1709 (2011).
- [3] Solomon, S., D. Qin, M. Manning, Z. Chen, M. Marquis, K.B. Averyt, M. Tignor and H.L. Miller (eds.). 2007a. *Climate Change 2007: The Physical Science Basis. Contribution of Working Group I to the Fourth Assessment Report of the Intergovernmental Panel on Climate Change.* Cambridge University Press, Cambridge, United Kingdom and New York, NY, USA.
- [4] Solomon S., D. Qin, M. Manning, Z. Chen, M. Marquis, K.B. Averyt, M. Tignor, and H.L. Miller (eds.) 2007b. *Climate change 2007: the synthesis report. Contribution of Working Group I to the Fourth Assessment Report of the Intergovernmental Panel on Climate Change.* Cambridge, United Kingdom and New York: Cambridge University Press. 996 p.
- [5] World Business Council for Sustainable Development, 2004. Vision 2050. Available on the internet at: [http://www.wbcsd.org/WEB/PROJECTS/BZROLE/VISION2050-FULLREPORT\\_FINAL.PDF](http://www.wbcsd.org/WEB/PROJECTS/BZROLE/VISION2050-FULLREPORT_FINAL.PDF)
- [6] Berzi, L., Delogu, M., Pierini, M., 2016. A comparison of Electric Vehicles use-case scenarios - Application of a simulation framework to vehicle design optimization and energy consumption assessment. *Proceedings of the 17th IEEE International Conference on Environment and Electrical Engineering*, 7-10, June, Florence, Italy.
- [7] Dattilo, C.A., Delogu, M., Berzi, L., Pierini, M., 2016. A sustainability analysis for Electric Vehicles Batteries including aging phenomena. *Proceedings of the 17th IEEE International Conference on Environment and Electrical Engineering*, 7-10 June, Florence, Italy.
- [8] European Commission, 2012. *Proposal for a Regulation of the European Parliament and of the Council Amending Regulation (EC) No. 443/2009 to Define the Modalities for Reaching the 2020 Target to Reduce CO2 Emissions from New Passenger Cars* European Commission, Brussels (2009).
- [9] Ford, J. D., Berrang-Ford, L., Paterson, J., 2011. A systematic review of observed climate change adaptation in developed nations. *Clim. Change* 2011, 106 (2), 327–336.
- [10] IPCC, 2013. *Climate Change 2013: The Physical Science Basis, Working Group I Contribution to the Fifth Assessment Report of the Intergovernmental Panel on Climate Change*; Cambridge University Press: Cambridge, U.K., 2013.
- [81] Moawad, A., Sharer, P., Rousseau, A., 2013. Light-Duty Vehicle Fuel Consumption Displacement Potential up to 2045; ANL/ESD/11-4; Argonne National Laboratory: Lemont, IL, 2013.
- [91] O' Neill, B. C., Oppenheimer, M., 2002. Climate change: dangerous climate impacts and the Kyoto Protocol. *Science* 2002, 296 (5575), 1971 – 1972.
- [103] Steffen, W., Noble, I., Canadell, J., Apps, M., Schulze, E.-D., Jarvis, P. G., 1998. The terrestrial carbon cycle: implications for the Kyoto Protocol. *Science* 1998, 280 (5368), 1393 – 1394.
- [114] Susan, S., 2007. *Climate Change 2007. The Physical Science Basis, Working group I Contribution to the Fourth Assessment Report of the IPCC*; Cambridge University Press: Cambridge, U.K., 2007; Vol. 4.
- [15] U.S. EPA, 2012. *National Highway Traffic Safety Administration, 2012-2017 and Later Model Year Light-Duty Vehicle Greenhouse Gas Emissions and Corporate Average Fuel Economy Standards*; U.S. EPA; U.S. NHTSA: Washington, DC, 2012.
- [16] U.S. EPA, 2013. *Light-Duty Automotive Technology, Carbon Dioxide Emissions, and Fuel Economy Trends: 1975 Through 2012*; EPA-420-R-13-001; 2013.

**Formattato:** Normale, Interlinea singola, Tabulazioni: Non a 3,49 cm

**Formattato:** Rientro: Sinistro: 0 cm, Prima riga: 0 cm

**Formattato:** Regola lo spazio tra testo asiatico e in alfabeto latino, Regola lo spazio tra caratteri asiatici e numeri

**Formattato:** Rientro: Sinistro: 0 cm, Prima riga: 0 cm

- [17] U.S. EPA, 2014. Light Duty Automotive Technology, Carbon Dioxide Emissions, and Fuel Economy Trends: 1975–2014, PA-420-R-14-023; U.S. EPA: Washington, DC, 2014.
- [18] U.S. EPA, 2015. Website: <http://www3.epa.gov/> (accessed: January 2015).
- [129] Schmidt, W.P., Dahlqvist, E., Finkbeiner, M., Krinke, S., Lazzari, S., Oschmann, D., Pichon, S., Thiel, C., 2004. Life cycle assessment of lightweight and end-of-life scenarios for generic compact class vehicles. *Int J Life Cycle Assess* 9:405–416 (2004).
- [1320] Koffler, C., 2007. Automobile Produkt-Ökobilanzierung Wolfsburg/Darmstadt: Volkswagen AG, Technische Universität Darmstadt Dissertation.
- [1421] Koffler, C., Rodhe-Branderburger, K., 2010. On the calculation of fuel savings through lightweight design in automotive life cycle assessments. *Int J Life Cycle Assess* 15:128–135. doi:10.1007/s11367-009-0127-z (2010).
- [1522] Ribeiro, C., Ferreira, J.V., Partidário, P., 2007. Life Cycle Assessment of a multi-material car component. *Int J Life Cycle Assessment* 5:336–345 (2007).
- [1623] Nemry, F., Leduc, G., Mongelli, I., Uihlein, A., 2008. Environmental Improvement of Passenger Cars, IMPRO-car. Joint Research Center.
- [1724] Rodhe-Branderburger, K., Obernolte, J., 2008. CO<sub>2</sub>-Potential durch Leichtbau in Pkw, DVM-Tag 2008 – Leichtbaustategiein. Deutscher Verband für Materialforschung und –prüfung e.V, Berlin.
- [1825] Siskos, P., Capros, P., De Vita, A., 2015. CO<sub>2</sub> and energy efficiency car standards in the EU in the context of a decarbonisation strategy: A model-based policy assessment. *Energy Policy* 84, 22–34.
- [1926] Stichling, J. Life cycle considerations for lightweight automotive design. International Conference: Innovative Developments for Lightweight Vehicle Structures, Wolfsburg, Germany, May 26–27; Volkswagen Group: 2009; pp 209–218.
- [207] Berzi, L., Delogu, M., Pierini, M., 2016. Development of driving cycles for electric vehicles in the context of the city of Florence (2016) *Transportation Research Part D: Transport and Environment*, 47, pp. 299–322.
- [218] Kim, H. C.; Wallington, T. J., 2013b. Life-cycle energy and greenhouse gas emission benefits of lightweighting in automobiles: Review and harmonization. *Environ. Sci. Technol.* 2013, 47 (12), 6089–6097.
- [229] Kelly, J.C., Sullivan, J.L., Burnham, A., Elgowainy, A., 2015. Impacts of Vehicle Weight Reduction via Material Substitution on Life-Cycle Greenhouse Gas Emissions. *Environmental Science and Technology* 49, 12535–12542. doi:10.1021/acs.est.5b03192.
- [2330] Mayyas, A.T., Qattawi, A., Mayyas, A.R., Omar, M., 2013. Quantifiable measures of sustainability: a case study of materials selection for eco-lightweight auto-bodies. *Journal of Cleaner Production*, Special Volume: Sustainable consumption and production for Asia: Sustainability through green design and practice 40, 177–189.
- [2431] Raugei, M., Morrey, D., Hutchinson, A., Winfield, P., 2015. A coherent life cycle assessment of a range of lightweighting strategies for compact vehicles. *Journal of Cleaner Production*.
- [2532] Berzi, L., Delogu, M., Giorgetti, A., Pierini, M., 2013. On-field investigation and process modelling of End-of-Life Vehicles treatment in the context of Italian craft-type Authorized Treatment Facilities. *Waste Manag.* 33(4):892–906.
- [2633] Berzi, L., Delogu, M., Pierini, M., Romoli, F., 2016. Evaluation of the end-of-life performance of a hybrid scooter with the application of recyclability and recoverability assessment methods. *Resources, Conservation and Recycling*, 108, pp. 140–155.
- [2734] Ciacci, L., Marselli, L., Passarini, F., Santini, A., Vassura, I., 2010. A comparison among different automotive shredder residue treatment processes. *International Journal of Life Cycle Assessment*. DOI: 10.1007/s11367-010-0222-1.
- [2835] Das, S., 2000. The Life-Cycle Impacts of Aluminium Body-in-White Automotive Material. *Contemporary Al Issues – Research Summary*.

- [2936] Funazaki, A., Taneda, K., Tahara, K., Inaba, A., 2003. Automobile life cycle assessment issues at end-of-life and recycling. *JSAE Review* - Volume 24, Issue 4, October 2003, Pages 381–386. doi:10.1016/S0389-4304(03)00081-X.
- [307] Delogu, M., Zanchi, L., Maltese, S., Bonoli, A., Pierini, M. Environmental and Economic Life Cycle Assessment of a lightweight solution for an automotive component: a comparison between talc-filled and hollow glass microspheres-reinforced polymer composites. Submitted to *Journal of Cleaner Production*.
- [318] Geyer, 2008. Parametric Assessment of Climate Change Impacts of Automotive Material Substitution. *Environmental Science and Technology*. doi:10.102/es800314w.
- [329] Grujicic, M., Sellappan, V., He, T., Seyr, N., Obieglo, A., Erdmann, M., Holzleitner, J., 2009. Total Life Cycle-Based Materials Selection for Polymer Metal Hybrid Body-in-White Automotive Components. *Journal of Materials Engineering and Performance* (2009) 18:111-128. DOI: 10.1007/s11665-008-9279-4.
- [3340] Kim, K.H., Joung, H.T., Nam, H., Seo, Y.C., Hong, J.H., Yoo, T.W., Lim, B.S., Park, J.H., 2004. Management status of end-of-life vehicles and characteristics of automobile shredder residues in Korea. *Waste Management* 24 (2004) 533-540. DOI: 10.1016/j.wasman.2004.02.012.
- [3441] Rajendran, S., Scelsi, L., Hodzic, A., Soutis, C., Al-Maadeed, M.A., 2012. Environmental impact assessment of composites containing recycled plastics. *Resources, Conservation and Recycling* 60, 131–139.
- [3542] Zanchi, L., Delogu, M., Ierides, M., Vasiliadis, 2016. H. Life cycle assessment and life cycle costing as supporting tools for EVs lightweight design. *Smart Innovation, Systems and Technologies*, 52, pp. 335-348.
- [3643] Del Pero, F., Delogu, M., Pierini, M., Bonaffini, D., 2015. Life Cycle Assessment of a heavy metro train. *Journal of Cleaner Production*. Volume 87, 15 January 2015, Pages 787-799.
- [3744] Finkbeiner, M., Hoffmann, R., 2006. Application of Life Cycle Assessment for the Environmental Certificate of the Mercedes-Benz S-Class (7 pp). *Int J Life Cycle Assessment* 11, 240–246. doi:10.1065/lca2006.05.248 (2006).
- [3845] Koffler, C., 2013. Life cycle assessment of automotive lightweighting through polymers under US boundary conditions. *Int J Life Cycle Assess* 19, 538–545. doi:10.1007/s11367-013-0652-7.
- [46] Querini, F., Béziat, J.-C., Morel, S., Boeh, V., Rousseaux, P., 2011. Life cycle assessment of automotive fuels: critical analysis and recommendations on the emissions inventory in the tank-to-wheels stage. *Int J Life Cycle Assess* 16, 454–464. doi:10.1007/s11367-011-0273-y.
- [47] Stasinopoulos, P., Compston, P., Newell, B., Jones, H.M., 2011. A system dynamics approach in LCA to account for temporal effects—a consequential energy LCI of car body-in-whites. *Int J Life Cycle Assess* 17, 199–207. doi:10.1007/s11367-011-0344-0.
- [48] Tchertchian, N., Yvars, P.-A., Millet, D., 2013. Benefits and limits of a Constraint Satisfaction Problem/Life Cycle Assessment approach for the ecodesign of complex systems: a case applied to a hybrid passenger ferry. *Journal of Cleaner Production* 42, 1–18. doi:10.1016/j.jclepro.2012.10.048.
- [3949] Delogu, M., Del Pero, F., Romoli, F., Pierini, M., 2015. Life cycle assessment of a plastic air intake manifold. *The International Journal of Life Cycle Assessment* - October 2015, Volume 20, Issue 10, pp 1429-1443.
- [4050] Delogu, M., Del Pero, F., Berzi, L., Pierini, M., Bonaffini, D. End-of-Life in the railway sector: analysis of recyclability and recoverability for different vehicle case studies. Submitted to *Waste Management*.
- [51] Timmis, A.J., Hodzic, A., Koh, L., Bonner, M., Soutis, C., Schäfer, A.W., Dray, L., 2014. Environmental impact assessment of aviation emission reduction through the implementation of composite materials. *Int J Life Cycle Assess* 20, 233–243. doi:10.1007/s11367-014-0824-0.
- [4152] Spielmann, M., Althaus, H.J., 2006. Can a prolonged use of a passenger car reduce environmental burdens? Life Cycle analysis of Swiss passenger cars. *J. Cleaner Production* 15: 11-12. 1122-1134 (2006).

Codice campo modificato

Formattato: Italiano (Italia)

Codice campo modificato

Codice campo modificato

- [4253] Alves, C., Ferrao, P.M.C., Silva, A.J., Reis, L.G., Freitas, M., Rodrigues, L.B., 2010. Ecodesign of automotive components making use of jute fiber composites. *J. Cleaner Production* 2010; 18:313-27.
- [4354] Du J.D., Han, W.J., Peng, Y.H., Gu, C.C., 2010. Potential for reducing GHG emissions and energy consumption from implementing the aluminum intensive vehicle fleet in China. *Energy* 35: 4671-4678 (2010).
- [4455] Duflou J.R., De Moor, J., Verpoest, I., Dewulf, W., 2009. Environmental impact analysis of composite use in car manufacturing. *CIRP Ann – Manuf Technol* 58:9-12 (2009).
- [4556] Luz, S., Pires, A.C., Ferrao, P.M., 2010. Environmental benefits of substituting talc by sugarcane bagasse fibres as reinforcement in polypropylene composites: eco-design and LCA strategy for automotive components. *Resour Conserv Recyc*; 54:1135-44 (2010).
- ~~[57] Mayyas, A., Qattawi, D., Omar, M., Shan, D., 2012a. Design for sustainability in automotive industry: A comprehensive overview. *Renewable and Sustainable Energy Reviews*: 16, 1845-1862 (2012).~~
- ~~[58] Mayyas A.T., Qattawi A., Mayyas A.R., Omar M.A., 2012b. Life cycle assessment-based selection for a sustainable lightweight body-in-white design. *Energy* 39, 412-425 (2012).~~
- [4659] Vinodh, S., Jayakrishna, K., 2011. Environmental impact minimisation in an automotive component using alternative materials and manufacturing processes. *Materials and Design* December 2011, Vol. 32, No. 10, pp.5-82-5090 (2011).
- [46760] Zah, R., Hischier, R., Leao, A.L., Braun, I., 2006. Curauà fibers in the automobile industry – A sustainability assessment. *J Cleaner Production*; 15:1032-40.
- [47864] Ridge, L., 1997. EUCAR – automotive LCA guidelines – phase 2, Total life cycle conference and exposition. Society of Automotive Engineers (SAE), Graz (1997).
- [48962] Ribeiro, I., Peças, P., Silva, A., Henriques, E. Life Cycle Engineering Methodology Applied to Material Selection, a Fender Case Study. *J. Cleaner Prod.* 2008, 16, 1887–1899.
- [649503] Subic, A., Schiavone, F., 2006. Design-oriented application of LCA to an automotive system. 5<sup>th</sup> Australian Conference on Life Cycle Assessment. Achieving benefits fom managing life cycle impacts. Melbourne, 22-24 November 2006.
- [50164] Delogu, M., Del Pero, F., Pierini, M. Modelling of use stage in lightweight automotive LCA perspective: estimation of mass-induced fuel consumption reduction for gasoline turbocharged vehicles. Submitted to *Journal of Cleaner Production*.
- ~~[65] Rechs, M., Pinggen, B., Kunde, O., 1995. Fahrzeug- und Motorenkonzepte für das 3-Liter-Auto“, 5. Aachener Kolloquium Fahrzeug- und Motorentechnik, Eurogress Aachen, Oktober.~~
- ~~[66] Schäper, S., Leitemann, W., 1996. Energie, Emissions und Wirkbilanzen von Pkw in aluminium-intensiver und in konventioneller Bauweise sowie Optimierung eines Space-Frame-Karosserie-Konzeptes durch Variation der wesentlichen Fertigungsparameter mittels ganzheitlicher Bilanzierung. Ganzheitliche Betrachtungen im Automobilbau, VDI-Bericht 1307, VDI-Verlag, Düsseldorf.~~
- ~~[67] Schäper, S., 1997. Recycling of Aluminium Intensive Cars: The Audi A8, International Conference on Car Recycling and Recovery.~~
- [51268] Eberle, R., Franze, H.A., 1998. Modelling the Use Phase of Passenger Cars in LCI. Total life cycle conference and exposition. Society of Automotive Engineers (SAE) – SAE Technical Paper, Graz.
- [52369] Kim, H. C., Wallington, T. J., 2013. Life Cycle Assessment of Vehicle Lightweighting: A Physics-Based Model of Mass-Induced Fuel Consumption. *Environ. Sci. Technol.* 2013, 47 (24), 14358–14366.
- [53470] Kim, H. C., Wallington, T. J., Sullivan, J. L., Keoleian, G. A., 2015. Life Cycle Assessment of Vehicle Lightweighting: Novel Mathematical Methods to Estimate Use-Phase Fuel Consumption. *Environ. Sci. Technol.* 2015, 49 (16), 10209–10216.

**Formattato:** Rientro: Sinistro: 0 cm,  
Prima riga: 0 cm

**Formattato:** Italiano (Italia)

**Formattato:** SpazioDopo: 0 pt,  
Aggiungi spazio tra paragrafi dello  
stesso stile, Regola lo spazio tra testo  
asiatico e in alfabeto latino, Regola lo  
spazio tra caratteri asiatici e numeri

**Formattato:** Rientro: Sinistro: 0 cm,  
Prima riga: 0 cm

**Formattato:** Italiano (Italia)

- [54571] Pagerit, S., Sharer, P., Rousseau, A., 2006. Fuel Economy Sensitivity to Vehicle Mass for Advanced Vehicle Powertrains, in SAE 2006 World Congress. SAE International, SAE Paper No. 2006-01-0665: Detroit, Michigan.
- ~~[72] Cheah, L., Evans, C., 2007. Factor of Two: Halving the Fuel Consumption of New U.S. Automobiles by 2035. Massachusetts Institute of Technology.~~
- [55673] Wohlecker, R., Johannaber, M., Espig, M., 2007. Determination of Weight Elasticity of Fuel Economy for ICE, Hybrid and Fuel Cell Vehicles, in 2007 SAE World Congress. SAE International, SAE Paper No. 2007-01-0343: Detroit, Michigan.
- [56774] Casadei, A., Broda, R., 2008. Impact of Vehicle Weight Reduction on Fuel Economy for Various Vehicle Architectures. Ricardo Inc. Report prepared for the Aluminum Association, Inc.
- [57875] Redelbach, M., Klotzke, M., Friedrich, H.E., 2012. Impact of lightweight design on energy consumption and cost effectiveness of alternative powertrain concepts. European Vehicle Congress (EEVC), Brussel. (2012).
- [58976] Marotta, A., Tutuianu, M., 2012. Europe-centric light duty test cycle and differences with respect to the WLTP cycle. European Commission – Joint Research Centre – Scientific and policy reports.
- [596077] Mock, P., 2011. Inertia Classes Proposal. WLTP-DTP-LabProcICE-077. Submission to the UNECE GRPE informal subgroup on the development of a worldwide harmonized light vehicles test procedure (WLTP-DTP). The International Council on Clean Transportation (ICCT).
- [60178] Tutuianu, M., Marotta, A., Steve, H., Ericsson, E., Haniu, T., Ichikawa, N., Ishii, H., 2013. Development of a World-wide Worldwide harmonized Light duty driving Test Cycle (WLTC). United Nations Economic Commission for Europe (UNECE) - Working Party on Pollution and Energy group (GRPE).
- [61279] United States Environmental Protection Agency (EPA), 2015. Website: <http://www3.epa.gov/> (accessed: January 2015).
- [62380] United Nations Economic Commission for Europe (UNECE), 2015. Website: <http://www.unece.org/trans/welcome.html> (accessed: March 2015).
- [63481] Barlow, T.J., Latham S., McCrae, I.S., Boulter, P.G., 2009. A reference book of driving cycles for use in the measurement of road vehicle emissions. Copyright TRL.
- [64582] Kuhlwein, J., German, J., Baudiradekar, A., 2014. Development of test cycle conversion among worldwide light-duty vehicle CO2 emission standard. The International Council on Clean Transportation (ICCT).
